# Supplementary material for: Evaluation of static differential capacitance at the [C4mim+][TFSA−]/electrode interface using molecular dynamics simulation combined with electrochemical surface plasmon resonance measurements
Source: Royal Society of Chemistry journal article supplement (doi:10.1039/d1cp01435h), 2021-01-01
Supplement: d1cp01435h1.pdf [file d1cp01435h1.pdf]

Supporting Information:

**Evaluation of Static Differential Capacitance at the [C<sub>4</sub>mim<sup>+</sup>][TFSA<sup>-</sup>]/Electrode  
Interface Using Molecular Dynamics Simulation Combined with Electrochemical  
Surface Plasmon Resonance Measurements**

Shiwei Zhang<sup>1</sup>, Naoya Nishi<sup>1,\*</sup>, Seiji Katakura<sup>2</sup>, Tetsuo Sakka<sup>1</sup>

\*E-mail: nishi.naoya.7e@kyoto-u.ac.jp

<sup>1</sup>Department of Energy and Hydrocarbon Chemistry, Graduate School of Engineering,  
Kyoto University, Kyoto 615-8510, Japan

<sup>2</sup>Department of Electrical Engineering, Graduate School of Engineering, Nagoya  
University, Nagoya 464-8603, Japan

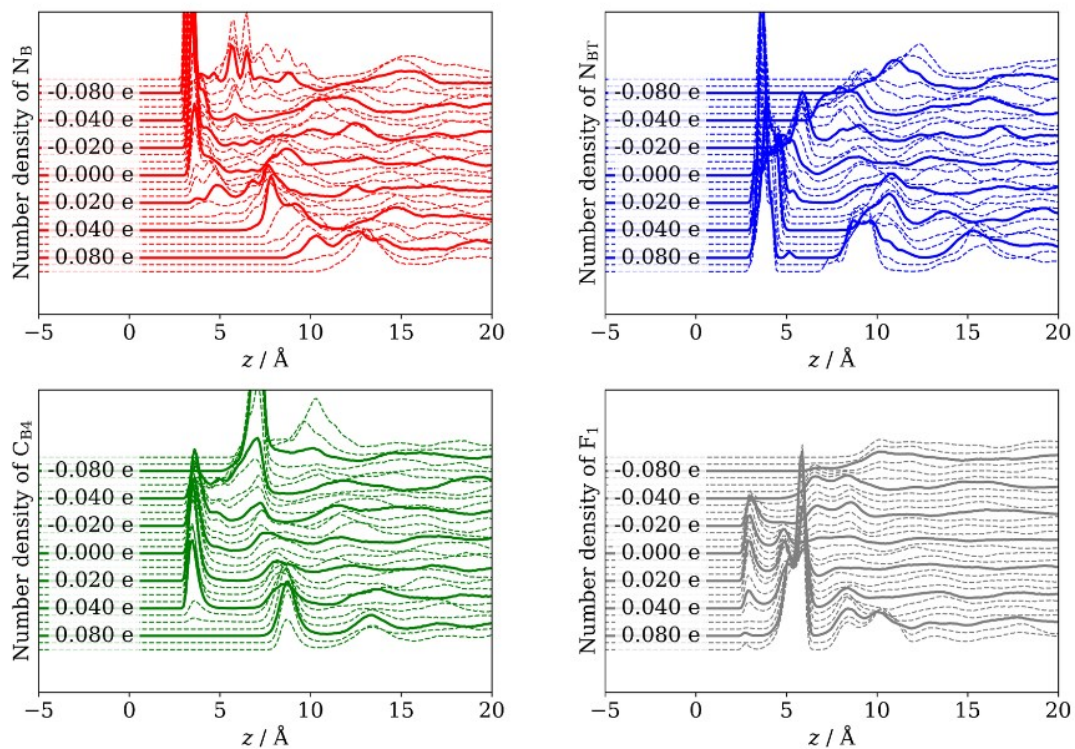

**Figure S1.** Atomic number density distributions profiles of  $N_B$ ,  $C_{B4}$ ,  $N_{BT}$  and  $F_1$  atoms (see Fig. 1 for the atom name definition) produced from the MD trajectories as examples.

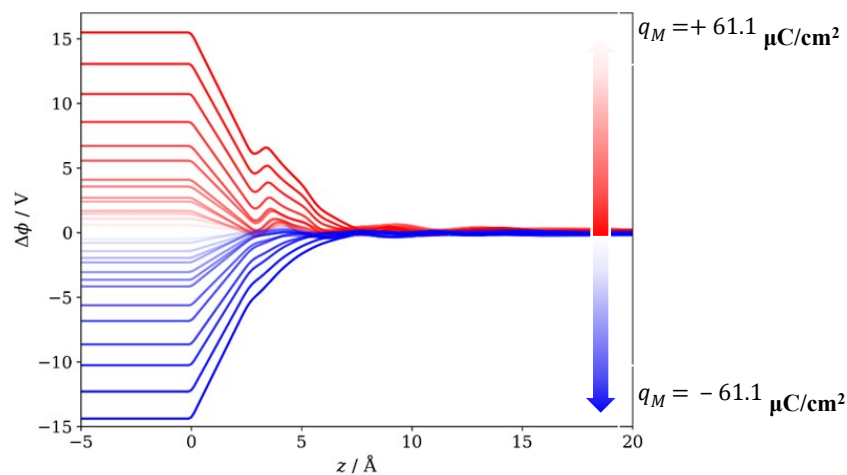

**Figure S2.** Potential distribution calculated by the one-dimensional Poisson equation.

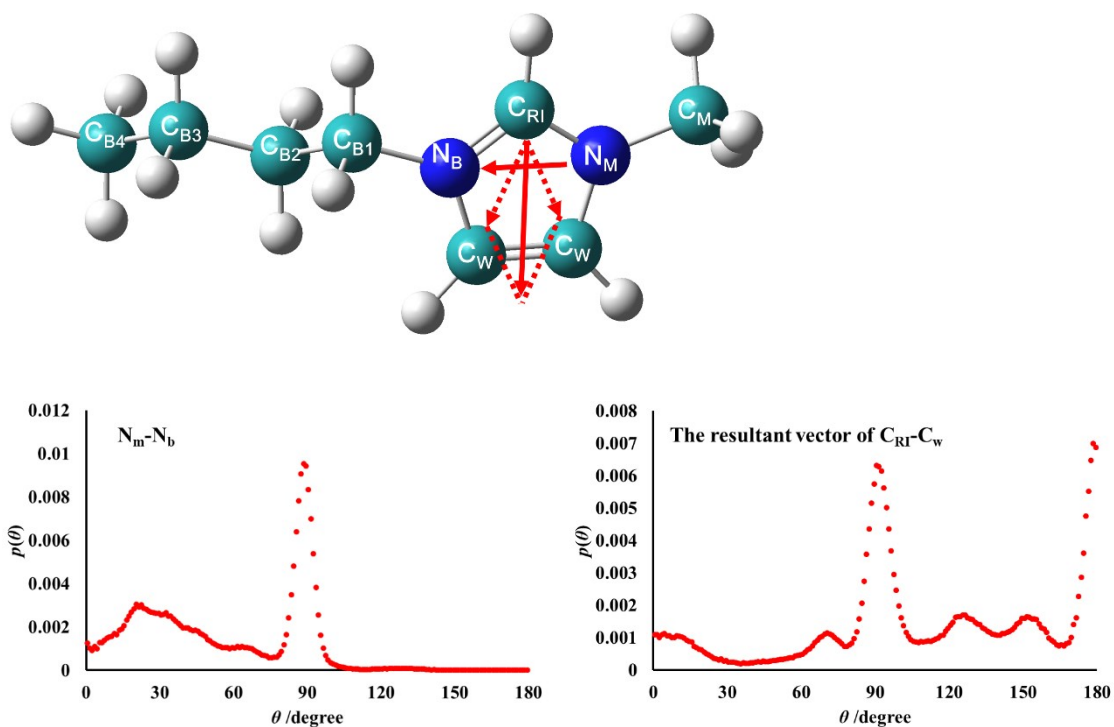

**Figure S3.** Orientation of imidazolium ring in the first and semi layers at  $q_M = -61.1 \mu\text{C}/\text{cm}^2$ . The probability density functions for the vector between the two N atoms (left) and the resultant vector of the two  $C_{RI}-C_w$  (right) are investigated. The two vectors both exhibit high peaks besides those at  $90^\circ$ , which means that some of the imidazolium rings are “standing up” if we include the semi-layer into the first ionic layer.

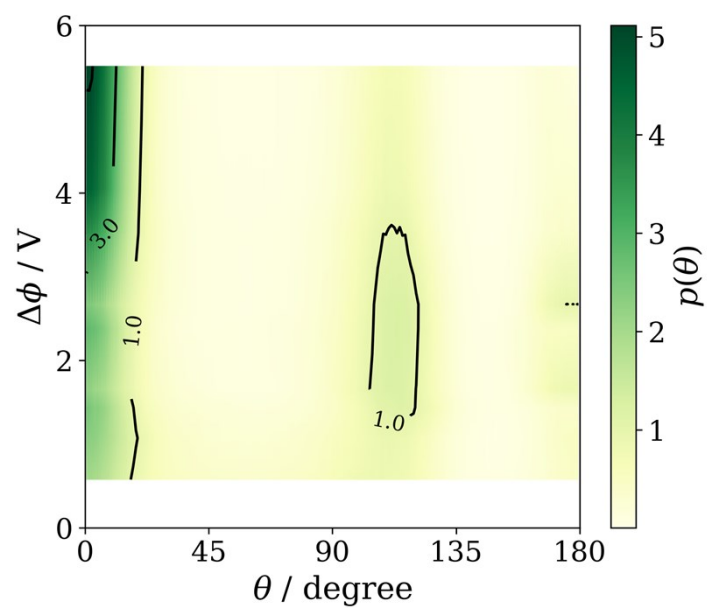

**Figure S4.** Dihedral angle of  $C_{BT}-S_{BT}-S_{BT}-C_{BT}$  in the anion near the positively charged electrode. Three peaks can be seen in all the potentials around  $0^\circ$ ,  $120^\circ$  and  $180^\circ$ . The peak around  $0^\circ$  is corresponding to the cis conformation, while those around  $120^\circ$  and  $180^\circ$  are to the trans conformation. At 2 V, the ratio of cis to trans conformation is about 2. As the potential goes positive, all the anions are tend to be in cis conformation.

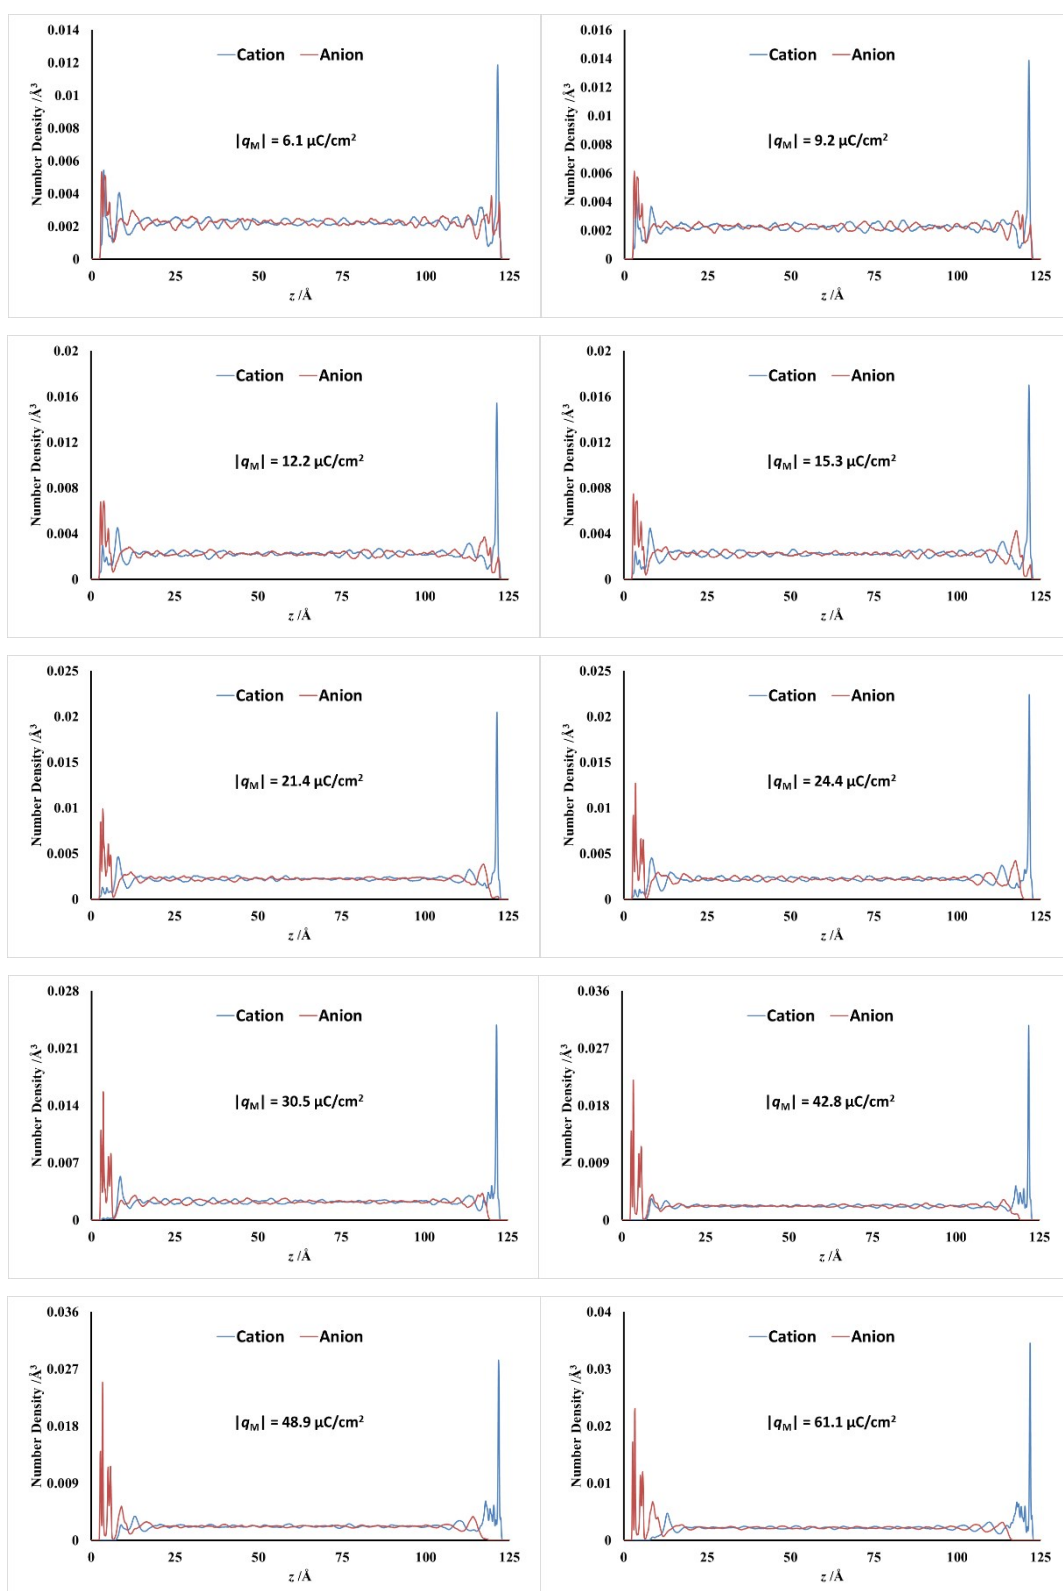

**Figure S5.** Ionic number density distributions in all the other charging conditions other than  $|q_M| = 0$ , 18.3, 36.6, and 55.0  $\mu\text{C}/\text{cm}^2$ , which are shown in Fig. 7.
